# Supplementary material for: Two high-nuclearity isopolyoxoniobates containing {Nb54 O151}-based helical nanotubes for the decomposition of chemical warfare agent simulants
Source: Royal Society of Chemistry journal article supplement (doi:10.1039/d1cc06878d), 2022-01-01
Supplement: d1cc06878d1.pdf [file d1cc06878d1.pdf]

## Supporting Information

### **Two high-nuclearity isopolyoxoniobates containing $\{\text{Nb}_{54}\text{O}_{151}\}$ -based helical nanotubes for the decomposition of chemical warfare agent simulants**

Yan-Lan Wu, Yong-Jiang Wang, Yan-Qiong Sun\*, Xin-Xiong Li and Shou-Tian Zheng \*

*State Key Laboratory of Photocatalysis on Energy and Environment, College of Chemistry, Fuzhou University, Fuzhou, Fujian 350108, China.*

E-mail: [sunyq@fzu.edu.cn](mailto:sunyq@fzu.edu.cn); [stzheng@fzu.edu.cn](mailto:stzheng@fzu.edu.cn);

#### **Contents**

|                   |                                               |
|-------------------|-----------------------------------------------|
| <b>Section S1</b> | <b>Experiments and Methods</b>                |
| <b>Section S2</b> | <b>Additional Tables</b>                      |
| <b>Section S3</b> | <b>Additional Figures and Characteristics</b> |
| <b>Section S4</b> | <b>References</b>                             |

## Section S1: Experiments and Methods

### 1. Material and general methods

All chemicals were commercially purchased and used without further purification.  $\text{K}_7\text{HNb}_6\text{O}_{19}\cdot 13\text{H}_2\text{O}$  was prepared according to the literature and identified by IR spectrum.<sup>S1</sup> IR spectra were determined in the range 4000-400  $\text{cm}^{-1}$  on a Nicolet IS50 Fourier transform infrared (FT/IR) spectrometer. ICP analyses were conducted on an Ultima2 spectrometer. XPS analyses were conducted on a Thermo Scientific Nexsa.  $^{31}\text{P}$  NMR (202.46 MHz) spectroscopy conducted on an AVANCE III 400 MHz spectrometer, was used to detect the reagents and products from the catalytic reactions. Samples were placed in 5 mm O.D. NMR tubes and chemical shifts were referenced to  $\text{H}_3\text{PO}_4$  (taken as 0 ppm at 25 °C). PXRD patterns were obtained by using an Ultima IV diffractometer with Cu-K $\alpha$  radiation ( $\lambda = 1.5418 \text{ \AA}$ ) in the range 5-50 °. Thermogravimetric analyses were conducted using a Mettler Toledo TGA/SDTA 851° analyzer in an  $\text{N}_2$ -flow atmosphere with a heating rate of 10 °C/min at a temperature of 30-800 °C. UV-vis spectra were performed on a SHIMADZU UV-2600 UV-visible spectrophotometer by using the  $\text{BaSO}_4$  as the blank.

### 2. Syntheses and Synthetic discussion

#### (1) Synthesis of $\text{H}_5\text{Na}_7\text{K}_4[\text{Cu}(\text{en})_2]_2[\text{Cu}(\text{en})(\text{H}_2\text{O})]_2[\text{Cu}(\text{en})_2(\text{H}_2\text{O})]_4[\text{Nb}_{54}\text{O}_{151}]\cdot 27\text{H}_2\text{O}$ (1).

A mixture of  $\text{K}_7\text{HNb}_6\text{O}_{19}\cdot 13\text{H}_2\text{O}$  (0.665 g, 0.485 mmol),  $\text{NaHCO}_3$  (0.405 g, 4.82 mmol),  $\text{Cu}(\text{CH}_3\text{COO})_2\cdot \text{H}_2\text{O}$  (0.086 g, 0.431 mmol),  $\text{Li}_2\text{B}_4\text{O}_7$  (0.049 g, 0.290 mmol), 0.05 mL en was mixed in 10 mL  $\text{H}_2\text{O}$ . After stirred 1 hour, the resulting mixture was sealed in a Teflon-lined autoclave (23 mL) and heated at 200 °C for 5 days. After cooling down, the filtrate was kept at room temperature for about one week and light purple crystals were obtained. Yield: 70 mg (13.6 %, based on Nb). The pH values before and after reaction were ca. 9.5 and 9.0, respectively. Elemental analysis (based on dried sample) calcd (found) % for  $\text{H}_{183}\text{Na}_7\text{K}_4\text{Cu}_8\text{C}_{28}\text{N}_{28}\text{Nb}_{54}\text{O}_{184}$ : Na, 1.66 (1.68); Cu, 5.24 (5.30); K, 1.61 (1.63); Nb, 51.72 (52.33). IR (KBr,  $\text{cm}^{-1}$ ): 3248(m), 1629(s), 1418(s), 1109(m), 1036(m), 912(s), 846(w), 831(s), 752(w), 656(s), 562(s), 496(w).

#### (2) Synthesis of $\text{H}_3\text{Na}_4\text{K}_3[\text{Cu}(\text{H}_2\text{O})_3][\text{Cu}(\text{en})_2]_2[\text{Cu}(\text{en})(\text{H}_2\text{O})]_4[\text{Cu}(\text{en})_2(\text{H}_2\text{O})]_4[\text{Nb}_{54}\text{O}_{151}]\cdot 22\text{H}_2\text{O}$ (2).

A mixture of  $\text{K}_7\text{HNb}_6\text{O}_{19}\cdot 13\text{H}_2\text{O}$  (0.655 g, 0.478 mmol),  $\text{NaHCO}_3$  (0.4 g, 4.76 mmol),  $\text{Cu}(\text{CH}_3\text{COO})_2\cdot\text{H}_2\text{O}$  (0.088 g, 0.441 mmol),  $\text{Li}_2\text{B}_4\text{O}_7$  (0.05 g, 0.296 mmol), 0.05 mL en was mixed in 10 mL  $\text{H}_2\text{O}$ , After stirred 1 hour, the resulting mixture was sealed in a Teflon-lined autoclave (23 mL) and heated at 160 °C for 5 days. After cooling to room temperature, light purple crystals were obtained. Yield: 25 mg (4.75 %, based on Nb). The pH values before and after reaction were ca. 9.6 and 9.0, respectively. Elemental analysis (based on dried sample) calcd (found %) for  $\text{H}_{197}\text{Na}_4\text{K}_3\text{Cu}_{11}\text{C}_{32}\text{N}_{32}\text{Nb}_{54}\text{O}_{184}$ : Na, 0.93 (0.94); Cu, 7.06 (7.15); K, 1.18 (1.20); Nb, 50.68 (51.34). IR (KBr,  $\text{cm}^{-1}$ ): 3238(m), 1641(s), 1576(s), 1364(m), 1160(w), 1101(w), 1036(s), 912(s), 861(s), 825(w), 744(s), 569(s), 469(w).

### (3). Synthetic Discussion

In this work, we found that the following reaction parameters show important impacts on the syntheses:

(1) The temperature of hydrothermal reactions is one of the important factors for the syntheses of compounds **1** and **2**. The mixture raw materials of compound **1** reacted in 200 °C high temperature, and then the reaction products were filtrated. The crystals of compound **1** were obtained by evaporating the filtrate at room temperature for about one week, while compound **2** was obtained in lower temperature 160 °C. When the reaction is higher or lower than the specific temperature, the yield would decrease dramatically and only amorphous phases would be obtained.

(2) We synthesized two compounds in  $\text{H}_2\text{O}$  in presence of en, when we changed the solvent to other buffer solutions, such as  $\text{Na}_2\text{CO}_3/\text{NaHCO}_3$  and  $\text{Na}_2\text{B}_4\text{O}_7/\text{H}_3\text{BO}_3$ , or changed the en to other organic-ammines, none of them would be obtained in the reaction.

(3) We have further explored different synthetic methods to improve the yield of the products, for example adjusting the reactant ratio, reaction time, pH values of the reaction. We have modulated the reaction ratio about raw materials of compound **1**, the crystals would be obtained as the mass of  $\text{Cu}(\text{CH}_3\text{COO})_2\cdot\text{H}_2\text{O}$  was 0.1g, but the yield of product was low. When we further increased or decreased the mass of  $\text{Cu}(\text{CH}_3\text{COO})_2\cdot\text{H}_2\text{O}$ , the product of **1** could not be obtained. When we did the same investigation of compound **2**, we would not obtain the products of **2**. To lengthen or shorten the reaction time to 120 min, 90 min, 45 min, 40 min, 15 min, 2 min for compounds **1** and **2**, we could not obtain both of them under the hydrothermal reaction or with a solvent evaporation method at room temperature. When we adjusted the pH of buffer solution, a lot of amorphous phases would be obtained. When we adjust the quantity of solvent and alkaline metal salts, we could not obtain

samples as well and all of these investigations may probably suggest the reaction conditions of compounds **1** and **2** are harsh. So the yields for compounds **1** and **2** were low.

### **3. Single-crystal X-ray Crystallography**

Crystals were collected on a Bruker APEX Due CCD area diffractometer equipped with a fine focus, 2.0 kW sealed tube X-ray source (MoK $\alpha$  radiation,  $\lambda = 0.71073 \text{ \AA}$ ) operating at 175(2) K. The empirical absorption correction was based on equivalent reflections. Structures were solved by direct methods followed by successive difference Fourier methods. Computations were performed using SHELXTL and final full-matrix refinements were against  $F^2$ .<sup>S2</sup> The contribution of disordered solvent molecules to the overall intensity data of structures were treated using the SQUEEZE method in PLATON, and the details of squeeze have been included in the end of CIF files of two compounds, and we can see that the disordered atoms in void are less than  $3.91 \text{ eA}^{-3}$ , suggesting that they are reasonable to use Squeeze method. CCDC 2105822-2105823 contain the supplementary crystallographic data for compounds **1** and **2**, respectively.

### **4. Supplementary Physical Characterization**

#### **(1) Degradation of DMMP by compound 1**

In a typical reaction, 50 mg of compound **1**, DMMP (2.5  $\mu\text{L}$ ) and D<sub>2</sub>O (0.6 mL) were mixed with 1.0 mL of deionized water in a 2-mL scintillation vial. This mixture was vigorously stirred at room temperature. Every several hours, a 400  $\mu\text{L}$  aliquot of the solvent was transferred into the NMR tube for <sup>31</sup>P NMR measurement; the aliquot was then transferred back to the vial for further reaction. After 264 hours, the solid was collected by centrifugation, washed extensively with mother liquid of compound **1** and dried. The resulting solid was then characterized by FT-IR.

#### **(2) Degradation of DECP by compound 1**

In a typical reaction, 30 mg of compound **1** was suspended in 600  $\mu\text{L}$  of DMF placed in a 5-mL O.D. NMR tube. Subsequently, 10  $\mu\text{L}$  of DECP and 50  $\mu\text{L}$  of H<sub>2</sub>O were added. The mixture was vigorously shaken at room temperature. Every 5 minutes, the contents were assessed by <sup>31</sup>P NMR spectroscopy to monitor the reaction. After the DECP has been completely hydrolyzed, the solid was collected by centrifugation, washed extensively with mother liquid of compound **1** and dried. The resulting solid was then characterized by FT-IR and XRD.

### **Section S2 Additional Tables**

**Table S1 Crystal Data and Structure Refinements for 1-2.**

| <i>Compound</i>                                                 | <b>1</b>                                                                                                                          | <b>2</b>                                                                                                                           |
|-----------------------------------------------------------------|-----------------------------------------------------------------------------------------------------------------------------------|------------------------------------------------------------------------------------------------------------------------------------|
| Empirical formula                                               | H <sub>183</sub> Na <sub>7</sub> K <sub>4</sub> Cu <sub>8</sub> C <sub>28</sub> N <sub>28</sub> Nb <sub>54</sub> O <sub>184</sub> | H <sub>197</sub> Na <sub>4</sub> K <sub>3</sub> Cu <sub>11</sub> C <sub>32</sub> N <sub>32</sub> Nb <sub>54</sub> O <sub>184</sub> |
| <i>M</i>                                                        | 9699.80                                                                                                                           | 9900.54                                                                                                                            |
| <i>T</i> /K                                                     | 175(2)                                                                                                                            | 175(2)                                                                                                                             |
| Crystal system                                                  | Orthorhombic                                                                                                                      | Orthorhombic                                                                                                                       |
| Space group                                                     | <i>Cmca</i>                                                                                                                       | <i>Cmca</i>                                                                                                                        |
| <i>a</i> /Å                                                     | 56.364(3)                                                                                                                         | 56.743(3)                                                                                                                          |
| <i>b</i> /Å                                                     | 20.1214(12)                                                                                                                       | 19.9065(10)                                                                                                                        |
| <i>c</i> /Å                                                     | 51.165(3)                                                                                                                         | 55.091(2)                                                                                                                          |
| $\alpha$ /°                                                     | 90                                                                                                                                | 90                                                                                                                                 |
| $\beta$ /°                                                      | 90                                                                                                                                | 90                                                                                                                                 |
| $\gamma$ /°                                                     | 90                                                                                                                                | 90                                                                                                                                 |
| <i>V</i> /Å <sup>3</sup>                                        | 58027(6)                                                                                                                          | 62229(5)                                                                                                                           |
| <i>Z</i>                                                        | 8                                                                                                                                 | 8                                                                                                                                  |
| <i>D<sub>c</sub></i> /Mg m <sup>-3</sup>                        | 2.221                                                                                                                             | 2.114                                                                                                                              |
| $\mu$ /mm <sup>-1</sup>                                         | 2.769                                                                                                                             | 2.765                                                                                                                              |
| <i>F</i> (000)                                                  | 36944                                                                                                                             | 37752                                                                                                                              |
| Data/restraints/parameters                                      | 25893 / 12 / 1284                                                                                                                 | 27793 / 8 / 1334                                                                                                                   |
| <i>R</i> <sub>1</sub> ( <i>I</i> > 2σ( <i>I</i> )) <sup>a</sup> | 0.0808                                                                                                                            | 0.0679                                                                                                                             |
| <i>wR</i> <sub>2</sub> (all data) <sup>a</sup>                  | 0.2405                                                                                                                            | 0.1933                                                                                                                             |
| Goodness-of-fit on <i>F</i> <sup>2</sup>                        | 1.064                                                                                                                             | 1.026                                                                                                                              |

<sup>a</sup> $R_1 = \sum ||F_o| - |F_c|| / \sum |F_o|$ ;  $wR_2 = \sum [w(F_o^2 - F_c^2)^2] / \sum [w(F_o^2)^2]^{1/2}$

**Table S2 Bond lengths and valence band summations of copper atoms in 1.**

| Atom1 | Atom2 | Rij    | Ro   | B   | Sij      | SUM      |
|-------|-------|--------|------|-----|----------|----------|
| Cu1   | N4    | 1.9628 | 1.61 | 0.4 | 0.413954 |          |
|       | N3    | 2.0155 | 1.61 | 0.4 | 0.362856 |          |
|       | N5    | 2.0156 | 1.61 | 0.4 | 0.362765 |          |
|       | N6    | 2.0338 | 1.61 | 0.4 | 0.346629 |          |
|       | O65   | 2.467  | 1.65 | 0.4 | 0.129704 |          |
|       | OW9   | 2.626  | 1.65 | 0.4 | 0.087161 | 1.703069 |
| Cu2   | N14   | 1.9397 | 1.61 | 0.4 | 0.438564 |          |
|       | N7    | 1.9876 | 1.61 | 0.4 | 0.389068 |          |
|       | N1    | 2.0461 | 1.61 | 0.4 | 0.336132 |          |
|       | N8    | 2.1455 | 1.61 | 0.4 | 0.262173 |          |
|       | O56   | 2.542  | 1.65 | 0.4 | 0.107528 |          |
|       | O48   | 2.674  | 1.65 | 0.4 | 0.077305 | 1.610771 |
| Cu3   | N11   | 1.9608 | 1.61 | 0.4 | 0.416029 |          |
|       | N10   | 2.0078 | 1.61 | 0.4 | 0.369908 |          |
|       | N12   | 2.0233 | 1.61 | 0.4 | 0.355849 |          |
|       | N9    | 2.026  | 1.61 | 0.4 | 0.353455 |          |

|     |     |        |      |     |          |          |
|-----|-----|--------|------|-----|----------|----------|
|     | OW7 | 2.629  | 1.65 | 0.4 | 0.08651  |          |
|     | O50 | 2.575  | 1.65 | 0.4 | 0.099013 | 1.680764 |
| Cu4 | N13 | 1.9756 | 1.61 | 0.4 | 0.400917 |          |
|     | N13 | 1.9756 | 1.61 | 0.4 | 0.400917 |          |
|     | O5  | 2.0172 | 1.65 | 0.4 | 0.399317 |          |
|     | O5  | 2.0172 | 1.65 | 0.4 | 0.399317 |          |
|     | O1W | 2.3748 | 1.65 | 0.4 | 0.163327 | 1.763796 |
| Cu5 | O20 | 1.9802 | 1.65 | 0.4 | 0.438016 |          |
|     | O20 | 1.9802 | 1.65 | 0.4 | 0.438016 |          |
|     | N2  | 1.9929 | 1.61 | 0.4 | 0.383947 |          |
|     | N2  | 1.9929 | 1.61 | 0.4 | 0.383947 |          |
|     | O2W | 2.3744 | 1.65 | 0.4 | 0.163491 | 1.807417 |

**Table S3 Bond lengths and valence band summations of protonated oxygens in 1.**

| Atom1 | Atom2 | Rij    | Ro    | B     | Sij     | SUM     |
|-------|-------|--------|-------|-------|---------|---------|
| O59   | Nb16  | 1.8102 | 1.921 | 0.319 | 1.41529 | 1.41529 |

**Table S4 Bond lengths and valence band summations of copper atoms in 2.**

| Atom1 | Atom2 | Rij    | Ro   | B   | Sij      | SUM      |
|-------|-------|--------|------|-----|----------|----------|
| Cu1   | N6    | 2.0009 | 1.61 | 0.4 | 0.376345 |          |
|       | N7    | 2.0023 | 1.61 | 0.4 | 0.37503  |          |
|       | N8    | 2.0169 | 1.61 | 0.4 | 0.361588 |          |
|       | N5    | 2.0308 | 1.61 | 0.4 | 0.349239 |          |
|       | O42   | 2.4284 | 1.65 | 0.4 | 0.142844 |          |
|       | O77   | 2.707  | 1.65 | 0.4 | 0.071183 | 1.676228 |
| Cu2   | N2    | 2.0152 | 1.61 | 0.4 | 0.363128 |          |
|       | N1    | 2.0188 | 1.61 | 0.4 | 0.359874 |          |
|       | N4    | 2.0242 | 1.61 | 0.4 | 0.355049 |          |
|       | N3    | 2.0286 | 1.61 | 0.4 | 0.351165 |          |
|       | O33   | 2.552  | 1.65 | 0.4 | 0.104874 |          |
|       | O78   | 2.612  | 1.65 | 0.4 | 0.090265 | 1.624355 |
| Cu3   | O24   | 1.9843 | 1.65 | 0.4 | 0.433549 |          |
|       | O24   | 1.9843 | 1.65 | 0.4 | 0.433549 |          |
|       | N9    | 2.01   | 1.61 | 0.4 | 0.367879 |          |
|       | N9    | 2.01   | 1.61 | 0.4 | 0.367879 |          |
|       | O1W   | 2.3309 | 1.65 | 0.4 | 0.182273 | 1.78513  |
| Cu4   | O22   | 1.9857 | 1.65 | 0.4 | 0.432034 |          |
|       | O22   | 1.9857 | 1.65 | 0.4 | 0.432034 |          |
|       | N10   | 2.0022 | 1.61 | 0.4 | 0.375123 |          |
|       | N10   | 2.0022 | 1.61 | 0.4 | 0.375123 |          |

|     |     |        |      |     |          |          |
|-----|-----|--------|------|-----|----------|----------|
|     | O5W | 2.3178 | 1.65 | 0.4 | 0.188341 | 1.802657 |
| Cu6 | O4  | 1.9086 | 1.65 | 0.4 | 0.523876 |          |
|     | O4  | 1.9086 | 1.65 | 0.4 | 0.523876 |          |
|     | O3W | 1.9869 | 1.65 | 0.4 | 0.43074  |          |
|     | O3W | 1.9869 | 1.65 | 0.4 | 0.43074  |          |
|     | O2W | 2.232  | 1.65 | 0.4 | 0.2334   | 2.142633 |
| Cu7 | N17 | 1.9531 | 1.61 | 0.4 | 0.424115 |          |
|     | N15 | 1.975  | 1.61 | 0.4 | 0.401519 |          |
|     | N14 | 1.9756 | 1.61 | 0.4 | 0.400917 |          |
|     | N16 | 2.1266 | 1.61 | 0.4 | 0.274858 |          |
|     | O31 | 2.511  | 1.65 | 0.4 | 0.116193 |          |
|     | O35 | 2.752  | 1.65 | 0.4 | 0.063609 | 1.681212 |
| Cu5 | O41 | 1.9391 | 1.65 | 0.4 | 0.485416 |          |
|     | N12 | 1.9514 | 1.61 | 0.4 | 0.425922 |          |
|     | O36 | 2.0325 | 1.65 | 0.4 | 0.384331 |          |
|     | N13 | 2.0869 | 1.61 | 0.4 | 0.303538 |          |
|     | O7W | 2.672  | 1.65 | 0.4 | 0.077692 | 1.676898 |

As shown in Table S2 and Table S4, BVS calculations of Cu atoms in the compounds **1** and **2** have been performed, the values of Cu atoms in compound **1** are 1.703, 1.611, 1.681, 1.764, 1.807, respectively, while the values of Cu atoms in compound **2** are 1.676, 1.624, 1.803, 2.142, 1.681, 1.677, respectively, which indicates that the valence states are about +2 for all Cu atoms in both of two compounds.

**Table S5 Bond lengths and valence band summations of protonated oxygens in 2.**

| Atom1 | Atom2 | Rij    | Ro    | B     | Sij      | SUM      |
|-------|-------|--------|-------|-------|----------|----------|
| O3    | Nb26  | 1.9576 | 1.921 | 0.319 | 0.891604 |          |
|       | Nb12  | 2.3019 | 1.921 | 0.319 | 0.302994 |          |
|       | Nb13  | 2.3200 | 1.921 | 0.319 | 0.28622  | 1.480878 |

**Table S6 Hydrolytic catalysis of chemical warfare agent simulants (DMMP and DECP) by PONbs.**

| Compound                                                                        | Substrate (DMMP or DECP) | Conversion | Ref  |
|---------------------------------------------------------------------------------|--------------------------|------------|------|
| $K_{12}[Ti_2O_2][SiNb_{12}O_{40}] \cdot 22H_2O$                                 | DMMP                     | 35.5%      | [7]  |
| $K_{12}[Ti_2O_2][GeNb_{12}O_{40}] \cdot 19 H_2O$                                | DMMP                     | 54%        | [7]  |
| $H_2Li_5Na_5K_5[Cu(en)_2]_7[Nb_{47}O_{128}(OH)_6(CO_3)_2] \cdot 20H_2O$         | DMMP                     | 46%        | [23] |
| $H_{16}K_{24}Na_{26}[Cu_3(en)_6][(\beta-H_4Nb_{52}O_{150})_2] \cdot 88H_2O$     | DMMP                     | 23.66%     | [22] |
| $Na_{12}\{H_{24}NbO_8Cu_{24}I_3O_3\{[Nb_7(OH)O_{21}]_8\} \cdot 34H_2O$          | DMMP                     | 26.5%      | S3   |
| $Na_{12}(H_2O)_{22}\{H_{22}NbO_8Cu_{24}I_3O\{[Nb_7(OH)O_{21}]_8\} \cdot 34H_2O$ | DMMP                     | 20.63%     | S3   |

|                                                                                                                                                                              |      |               |           |
|------------------------------------------------------------------------------------------------------------------------------------------------------------------------------|------|---------------|-----------|
| $\text{Na}_2\{\text{H}_{34}\text{GdO}_8\text{Cu}_{24}\text{Br}_5\text{O}[\text{Nb}_7(\text{OH})\text{O}_{21}]_8\} \cdot 12\text{H}_2\text{O}$                                | DMMP | 19.35%        | S3        |
| $\text{H}_4\text{Na}_8\text{K}_6[\text{Sb}_2\text{Nb}_{24}\text{O}_{72}] \cdot 30\text{H}_2\text{O}$                                                                         | DMMP | 35.9%         | [34]      |
| <b>1</b>                                                                                                                                                                     | DMMP | 40%           | This work |
| $\text{K}_{12}[\text{Ti}_2\text{O}_2][\text{GeNb}_{12}\text{O}_{40}] \cdot 19 \text{H}_2\text{O}$                                                                            | DECP | 100% (30 min) | [7]       |
| $\text{K}_{12}[\text{Ti}_2\text{O}_2][\text{SiNb}_{12}\text{O}_{40}] \cdot 22 \text{H}_2\text{O}$                                                                            | DECP | 100% (30 min) | [7]       |
| $\text{K}_8\text{Nb}_6\text{O}_{19}$                                                                                                                                         | DECP | 90% (30 min)  | [7]       |
| $\text{H}_{13}[(\text{CH}_3)_4\text{N}]_{12}[\text{PNb}_{12}\text{O}_{40}(\text{V}^{\text{V}}\text{O})_2(\text{V}^{\text{IV}}_4\text{O}_{12})_2] \cdot 22\text{H}_2\text{O}$ | DECP | 98% (30 min)  | [8]       |
| $\text{Na}_{15}[\text{PNb}_{12}\text{O}_{40}]$                                                                                                                               | DECP | 95% (30 min)  | [8]       |
| $[\text{C}_{18}\text{H}_{37}\text{N}(\text{CH}_3)_3]_7\text{HNb}_6\text{O}_{19}$                                                                                             | DECP | 100% (2 h)    | S4        |
| $\text{Mg}_3\text{Al-LDH-Nb}_6$ composite                                                                                                                                    | DECP | 97% (30 min)  | S5        |
| $\text{Na}_{12}\{\text{H}_{24}\text{NbO}_8\text{Cu}_{24}\text{I}_3\text{O}_3\{[\text{Nb}_7(\text{OH})\text{O}_{21}]_8\} \cdot 34\text{H}_2\text{O}$                          | DECP | 100% (35 min) | S3        |
| $\text{Na}_{12}(\text{H}_2\text{O})_{22}\{\text{H}_{22}\{\text{NbO}_8\text{Cu}_{24}\text{I}_3\text{O}[\text{Nb}_7(\text{OH})\text{O}_{21}]_8\} \cdot 34\text{H}_2\text{O}$   | DECP | 100% (20 min) | S3        |
| $\text{Na}_2\{\text{H}_{34}\text{GdO}_8\text{Cu}_{24}\text{Br}_5\text{O}[\text{Nb}_7(\text{OH})\text{O}_{21}]_8\} \cdot 12\text{H}_2\text{O}$                                | DECP | 100% (30 min) | S3        |
| <b>1</b>                                                                                                                                                                     | DECP | 100% (30 min) | This work |

### Section S3 Additional Figures and Characteristics

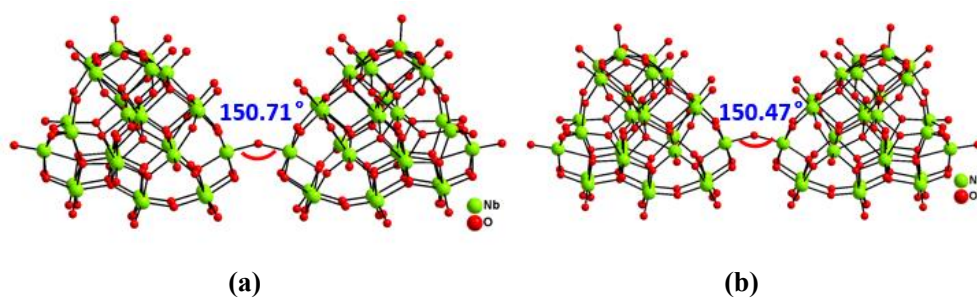

**Fig. S1** The  $\angle\text{Nb-O-Nb}$  angles of  $\{\text{Nb}_{54}\text{O}_{151}\}$  cluster in **1** (a) and **2** (b).

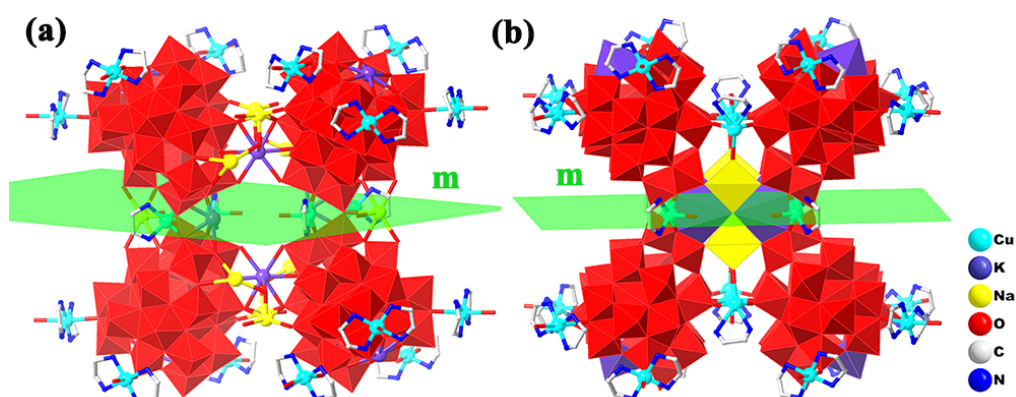

**Fig. S2** View of  $m$  plane in **1** (a) and **2** (b), respectively.



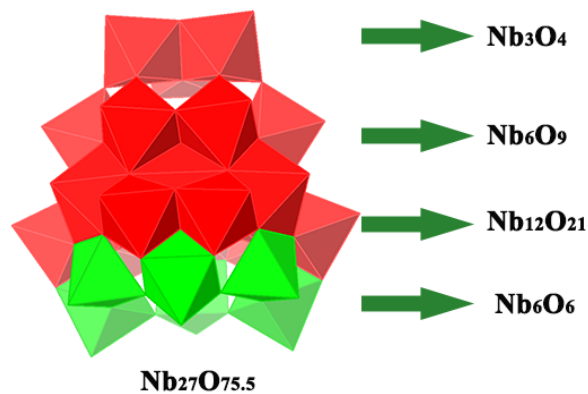

Fig. S3 View of the  $\text{Nb}_3\text{O}_4$ ,  $\text{Nb}_6\text{O}_9$ ,  $\text{Nb}_{12}\text{O}_{21}$ ,  $\text{Nb}_6\text{O}_6$  motifs in  $\text{Nb}_{27}\text{O}_{75.5}$  cluster.

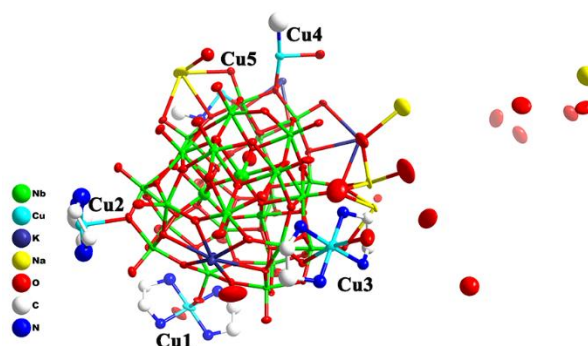

Fig. S4 Asymmetric unit of **1** represented by ORTEP plot.

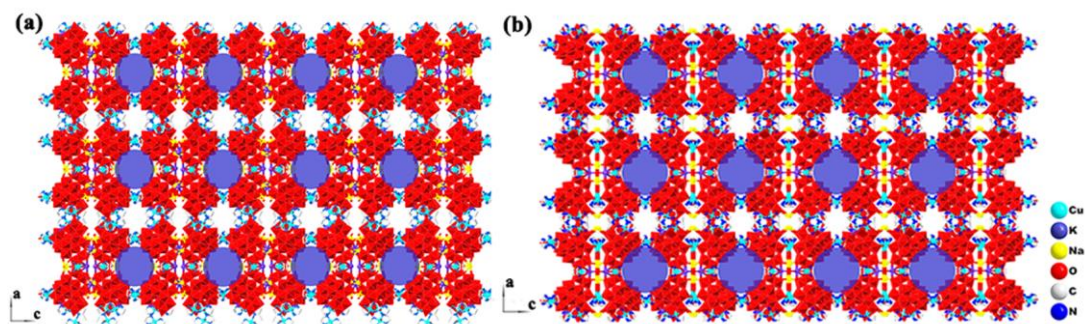

Fig. S5 View of the 3D stacking structures of **1**(a) and **2** (b) along the  $b$ -axis.

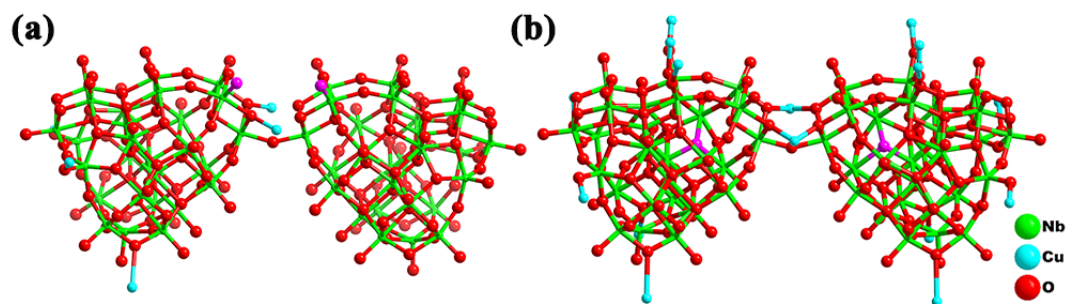

Fig. S6 The protonated oxygen atoms in **1** (a) and **2** (b). Color code: protonated oxygen, purple.

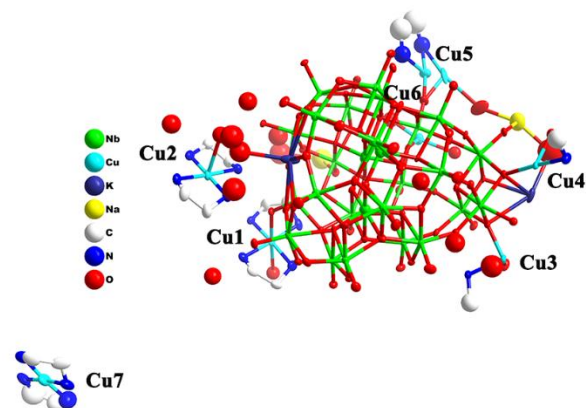

Fig. S7 Asymmetric unit of **2** represented by ORTEP plot.

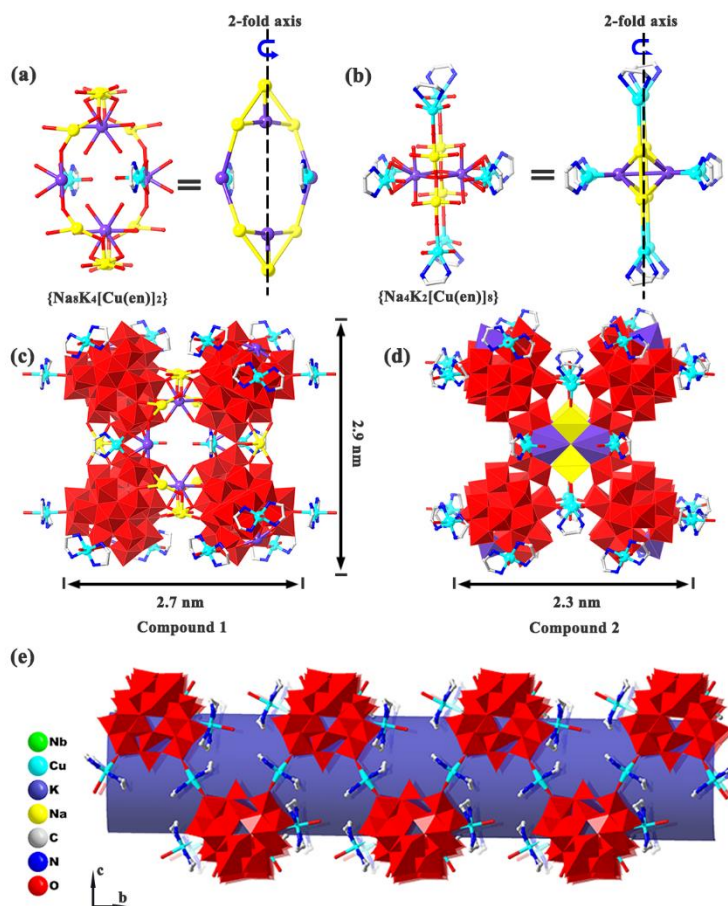

Fig. S8 The structures of compounds **1** and **2**. (a)  $\{Na_8K_4[Cu(en)]_2\}$  cage and linkage between alkaline metals in **1**; (b)  $\{Na_4K_2[Cu(en)]_8\}$  cage and linkage between alkaline metals in **2**; (c) the dimer  $\{Nb_{108}O_{302}\}$  of **1**; (d) the dimer  $\{Nb_{108}O_{302}\}$  cluster of **2**; (e) the nanotube in **1** (omitted all of alkaline metals), viewed along  $[100]$  direction, the unique  $\{Nb_{54}O_{151}\}$  SBUs combined with copper-amine complexes in parallel direction. Red polyhedrons:  $NbO_6$ .

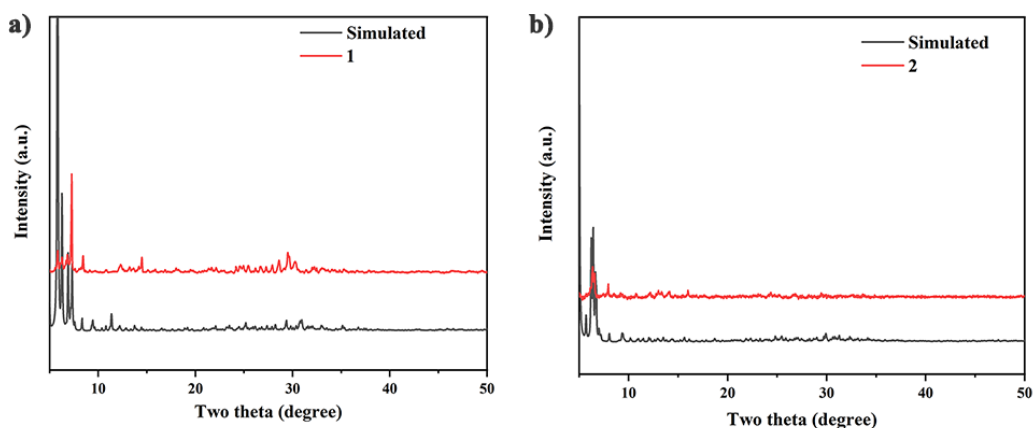

**Fig. S9** The simulated and experimented PXRD patterns of of **1** and **2**.

As shown in Fig. S9, I have tried to grind down the samples as fine as possible and re-test the PRXD of two compounds, and as shown in Fig S9, The main experimental PXRD peaks of two compounds are consistent with their simulated ones, respectively, except that there are differences in intensity, which may be due to the anisotropy of crystals.

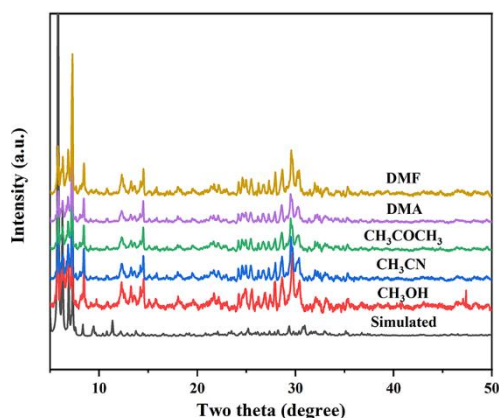

**Fig. S10** The simulated and PXRD patterns of **1** after being soaked in different organic solvents.

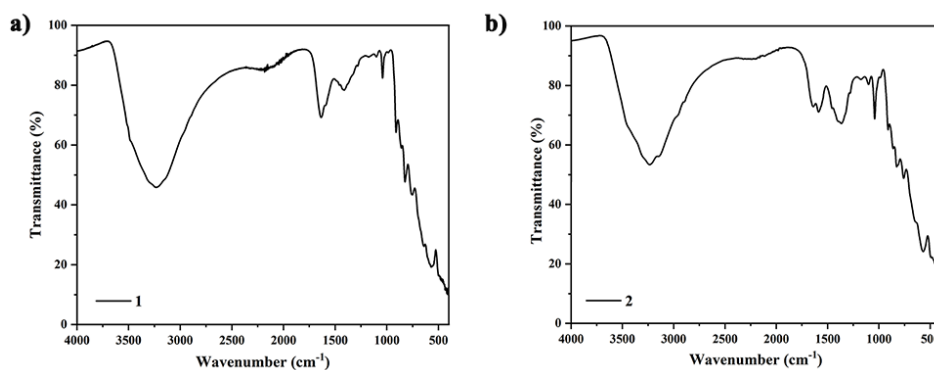

**Fig. S11** IR spectra of **1** and **2**.

As shown in Fig. S11, in the low wavenumber range, four main typical vibration peaks appear at 469-831  $\text{cm}^{-1}$ , which are assigned to the stretching vibrations of bridging Nb-O<sub>b</sub>-Nb, Cu-O and Cu-N.<sup>S6, S7</sup> Four strong peaks at 846-1036  $\text{cm}^{-1}$ , are attributed to the vibration of the terminal Nb=O<sub>t</sub>.

<sup>S8, S9</sup> Peaks between 1101 and 1641  $\text{cm}^{-1}$  are ascribed to the vibration of the C–N. <sup>S6</sup> In the high wavenumber region, the strong and wide peak between 3000  $\text{cm}^{-1}$  and 3500  $\text{cm}^{-1}$  corresponds to the O–H stretching vibration of lattice and coordination water molecules. <sup>S10</sup> These results are in good agreement with the result of the X-ray single-crystal structural analysis.

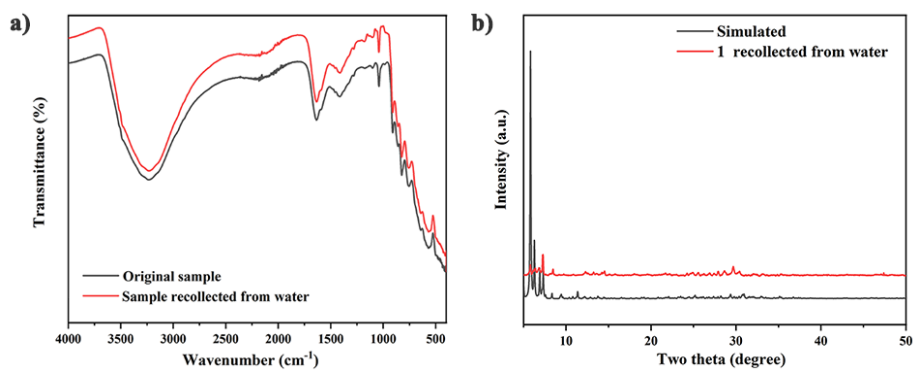

**Fig. S12** IR and PXRD spectra of **1** before and after being soaked in water.

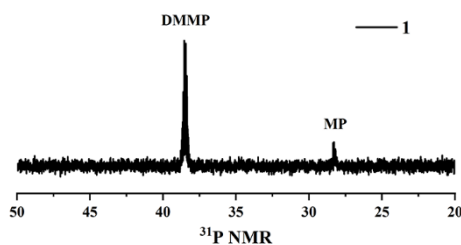

**Fig. S13** <sup>31</sup>P NMR peaks of DMMP and MP in 48h of **1**.

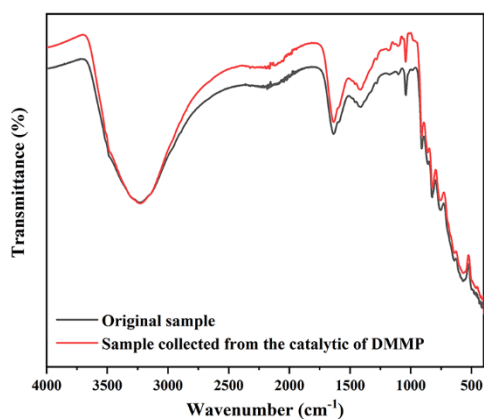

**Fig. S14** IR spectra of **1** before and after catalytic hydrolysis of DMMP.

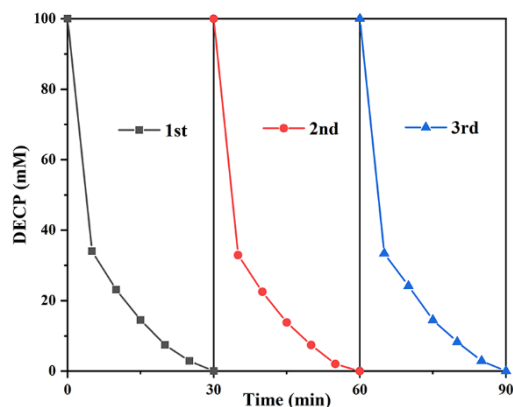

**Fig. S15** Three-cycle conversions of DECP to DEHP versus reaction time of using catalyst **1**.

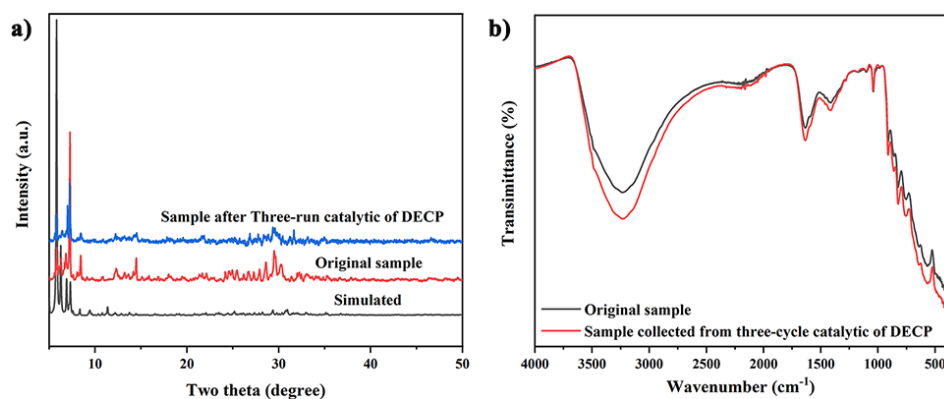

**Fig. S16** XRD patterns and IR spectra before and after three-cycle catalytic hydrolysis of DECP by **1**.

As shown in Fig.S16, the changes between the PXRD after the catalytic cycles and original samples are that the PXRD lines become rougher but the main peaks are accordance with the original samples, which may due to the worse crystallinity and decrease of quantity of catalyst after the catalytic cycles.

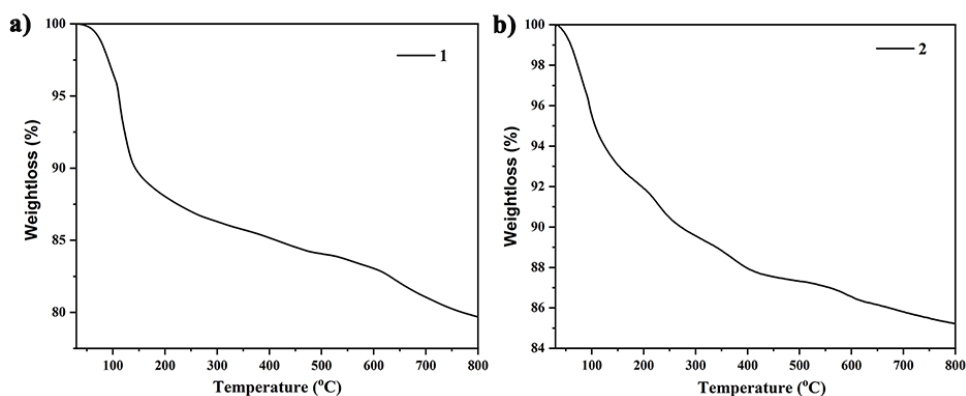

**Fig. S17** TG curves of **1** and **2**.

As shown in Fig. S17, both of **1** and **2** experienced a continuous weight loss process in the temperature range of 30 °C to about 600 °C. The first weight loss stage that occurs when the temperature was within the temperature range of 30 °C to 120 °C should be ascribed to the loss of lattice water molecules. Based on the first weight loss, 27 and 22 lattice water molecules were added

for **1** and **2**, respectively.

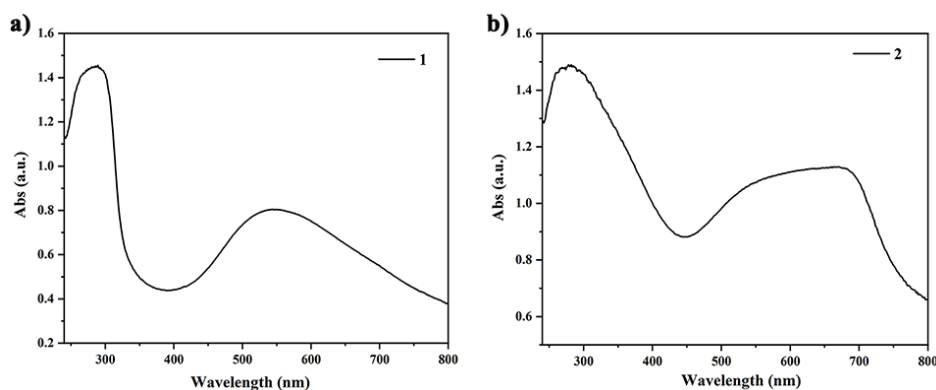

**Fig. S18** UV-vis Spectra of **1** and **2**.

The UV diffuse spectra of **1** and **2** are determined in the range of 240 to 800 nm. The absorption peak in the range of 240 to 400 nm can be ascribed to the charge transfer of O $\rightarrow$ Nb. The broad absorption peak in the range of 400 to 800 nm can be attributed to d-d transfers of Cu<sup>2+</sup>.

#### Section S4: References

- [S1] M. FILOWITZ, R. K. C. HO, W. G. KLEMPERER, and W. SHUM, *Inorg. Chem.*, 1979, **18**, 93-103.
- [S2] G. M. Sheldrick, *SHELXL97*, Program for Crystal Structure Refinement, University of Göttingen: Göttingen, Germany, 1997.
- [S3] Y. L. Wu, R. T. Zhang, Y. Q. Sun, X. X. Li and S. T. Zheng, *Front. Chem.*, 2020, **8**, 586009.
- [S4] X. Q. Li, J. Dong, H. F. Liu, X. R. Sun, Y. N. Chi, C. W. Hu, *J. Hazard. Mater.*, 2018, **344**, 994-999.
- [S5] J. Dong, H. J. Lv, X. R. Sun, Y. Wang, Y. M. Ni, B. Zou, N. Zhang, A. X. Yin, Y. N. Chi, and C. W. Hu, *Chem. Eur. J.*, 2018, **24**, 19208-19215.
- [S6] J. Q. Shen, Y. Zhang, Z. M. Zhang, Y.G. Li, Y. Q. Gao and E. B. Wang, *Chem. Commun.*, 2014, **50**, 6017-6019.
- [S7] M. Nyman, F. Bonhomme, T. M. Alam, M. A. Rodriguez, B. R. Cherry, J. L. Krumhansl, T. M. Nenoff, and A. M. Sattler, *Science.*, 2012, **297**, 996-998.
- [S8] G. Guo, Y. Xu, J. Cao and C. Hu, *Chem. Eur. J.*, 2012, **18**, 3493-3497.
- [S9] J. H. Son, C. A. Ohlin, R. L. Johnson, P. Yu and W. H. Casey, *Chem. Eur. J.*, 2013, **19**, 5191-5197.
- [S10] R. Chris, B. Valérie, G. M. Evan, R. Christian, B. Colette, *Inorg. Chem.*, 2012, **51**, 1142-1151.
